# Supplementary material
Source: PubMed Central journal article supplement (PMC4040270)
Supplement: NIHMS565053-supplement-supplement_1.pdf [file NIHMS565053-supplement-supplement_1.pdf]

**On-line supplement**Summary data

| objective                                                      | Healthy controls       | Asthma                 |                        | Kruskall Wallis<br>p value across<br>all groups |
|----------------------------------------------------------------|------------------------|------------------------|------------------------|-------------------------------------------------|
|                                                                |                        | low eosinophils        | high eosinophils       |                                                 |
| <i>integrity of the epithelium</i>                             |                        |                        |                        |                                                 |
| % intact                                                       | 16.24<br>(11.28-22.40) | 9.32<br>(5.53-20.50)   | 3.35<br>(0.35-9.01)    | P<0.001                                         |
| % real damage                                                  | 11.20<br>(0-24.57)     | 4.14<br>(0-14.49)      | 27.37<br>(0.27-45.48)  | P=0.04                                          |
| % artifactual<br>damage                                        | 70.32<br>(60.87-81.68) | 77.97<br>(68.19-86.78) | 66.01<br>(44.13-94.13) | P=0.256                                         |
| <i>goblet cell hyperplasia and epithelial mucin phenotype</i>  |                        |                        |                        |                                                 |
| Goblet cell number<br>% of total epithelial<br>cell number     | 7.67<br>(4.12-9.69)    | 8.31<br>(3.16-11.69)   | 6.24<br>(2.42-13.01)   | P=0.953                                         |
| % area Muc2                                                    | 0<br>(0-0)             | 0<br>(0-0.85)          | 0.70<br>(0-2.31)       | P=0.001                                         |
| % area Muc4                                                    | 0<br>(0-0)             | 0<br>(0-0)             | 0<br>(0-0)             | P=0.377                                         |
| % area Muc5AC                                                  | 4.87<br>(2.17-5.54)    | 3.44<br>(1.06-9.13)    | 6.67<br>(1.70-9.53)    | P=0.344                                         |
| % area Muc5B                                                   | 0<br>(0-0.53)          | 0<br>(0-0.89)          | 0<br>(0-0.41)          | P=0.997                                         |
| <i>Smooth muscle proportion &amp; inflammatory cell influx</i> |                        |                        |                        |                                                 |
| Proportion %                                                   | 26<br>(21-34)          | 33<br>(28-39)          | 33<br>(24-41)          | P=0.044                                         |
| Mast cells mm <sup>-2</sup> of<br>smooth muscle                | 3.98<br>(0.81-13.75)   | 7.49<br>(4.42-13.54)   | 13.07<br>(4.77-24.28)  | P=0.023                                         |

|                                               |            |            |                  |         |
|-----------------------------------------------|------------|------------|------------------|---------|
| Eosinophils mm <sup>-2</sup> of smooth muscle | 0<br>(0-0) | 0<br>(0-0) | 0.40<br>(0-2.96) | P<0.001 |
| Neutrophils mm <sup>-2</sup> of smooth muscle | 0<br>(0-0) | 0<br>(0-0) | 0<br>(0-0.64)    | P=0.024 |
| CD3+ cells mm <sup>-2</sup> of smooth muscle  | 0<br>(0-0) | 0<br>(0-0) | 0<br>(0-1.00)    | P<0.001 |

All data are medians and interquartile ranges
